## Title page

# Once upon a time in the far south: Influence of local drivers and functional traits on plant invasion in the harsh sub-Antarctic islands

Bazzichetto<sup>1\*</sup>, M., Massol<sup>2</sup>, F., Carboni<sup>3</sup>, M., Lenoir<sup>4</sup>, J., Lembrechts<sup>5</sup>, J. J., Joly<sup>1</sup>, R., & Renault<sup>1,6</sup>, D.

<sup>1</sup> Université de Rennes, CNRS, EcoBio (Ecosystèmes, biodiversité, évolution) - UMR 6553, F-35000 Rennes, France

<sup>2</sup> Université de Lille, CNRS, Inserm, CHU Lille, Institut Pasteur de Lille, U1019 - UMR 9017 - CIIL - Center for Infection and Immunity of Lille, F-59000 Lille, France

<sup>3</sup> Department of Sciences, University Roma Tre, Rome, Italy

<sup>4</sup> UR 'Ecologie et Dynamique des Systèmes Anthropisés' (EDYSAN, UMR 7058 CNRS-UPJV), Université de Picardie Jules Verne, Amiens, France

<sup>5</sup> Research Group PLECO (Plants and Ecosystems), University of Antwerp, 2610 Wilrijk, Belgium

<sup>6</sup> Institut Universitaire de France, 1 rue Descartes, 75231 Paris Cedex 05, France

**\*corresponding author**

## Authors information:

**Massol François:** Univ. Lille, CNRS, Inserm, CHU Lille, Institut Pasteur de Lille, U1019 - UMR 9017 - CIIL - Center for Infection and Immunity of Lille, F-59000 Lille, France

[francois.massol@univ-lille.fr](mailto:francois.massol@univ-lille.fr)

ORCID: <https://orcid.org/0000-0002-4098-955X>

**Carboni Marta:** Department of Sciences, University Roma Tre, Rome, Italy

[marta.carboni@uniroma3.it](mailto:marta.carboni@uniroma3.it)

ORCID: <https://orcid.org/0000-0002-9348-4758>

**Lenoir Jonathan:** UR 'Ecologie et Dynamique des Systèmes Anthropisés' (EDYSAN, UMR 7058 CNRS-UPJV), Université de Picardie Jules Verne, Amiens, France

[jonathan.lenoir@u-picardie.fr](mailto:jonathan.lenoir@u-picardie.fr)

ORCID: <https://orcid.org/0000-0003-0638-9582>

**Lembrechts Jonas Johan:** Research Group PLECO (Plants and Ecosystems), University of Antwerp, 2610 Wilrijk, Belgium

[jonas.lembrechts@uantwerpen.be](mailto:jonas.lembrechts@uantwerpen.be)

ORCID: <https://orcid.org/0000-0002-1933-0750>

**Joly Rémi:** Université de Rennes, CNRS, EcoBio (Ecosystèmes, biodiversité, évolution) - UMR 6553, F-35000 Rennes, France

[remi.joly88@hotmail.fr](mailto:remi.joly88@hotmail.fr)

**Renault David:** Université de Rennes, CNRS, EcoBio (Ecosystèmes, biodiversité, évolution) - UMR 6553, F-35000 Rennes, France; Institut Universitaire de France (IUF), 1 rue Descartes, 75231 Paris Cedex 05, France

[david.renault@univ-rennes1.fr](mailto:david.renault@univ-rennes1.fr)

ORCID: <https://orcid.org/0000-0003-3644-1759>

**Bazzichetto Manuele (corresponding author):** Université de Rennes, CNRS, EcoBio (Ecosystèmes, biodiversité, évolution) - UMR 6553, F-35000 Rennes, France

[manuele.bazzichetto@univ-rennes1.fr](mailto:manuele.bazzichetto@univ-rennes1.fr)

ORCID: <https://orcid.org/0000-0002-9874-5064>

# Once upon a time in the far south: Influence of local drivers and functional traits on plant invasion in the harsh sub-Antarctic islands

Manuele Bazzichetto<sup>1\*</sup>, François Massol<sup>2</sup>, Marta Carboni<sup>3</sup>, Jonathan Lenoir<sup>4</sup>, Jonas J Lembrechts<sup>5</sup>, Rémi Joly<sup>1</sup>, & David Renault<sup>1,6</sup>

<sup>1</sup> Université de Rennes, CNRS, EcoBio (Ecosystèmes, biodiversité, évolution) - UMR 6553, F-35000 Rennes, France

<sup>2</sup> Université de Lille, CNRS, Inserm, CHU Lille, Institut Pasteur de Lille, U1019 - UMR 9017 - CIIL - Center for Infection and Immunity of Lille, F-59000 Lille, France

<sup>3</sup> Department of Sciences, University Roma Tre, Rome, Italy

<sup>4</sup> UR 'Ecologie et Dynamique des Systèmes Anthropisés' (EDYSAN, UMR 7058 CNRS-UPJV), Université de Picardie Jules Verne, Amiens, France

<sup>5</sup> Research Group PLECO (Plants and Ecosystems), University of Antwerp, 2610 Wilrijk, Belgium

<sup>6</sup> Institut Universitaire de France, 1 rue Descartes, 75231 Paris Cedex 05, France

**\*corresponding author**

## 1 **Abstract**

## 2 **Aim**

3 Here, we aim to: (i) investigate the local effect of environmental and human-related factors on alien  
4 plant invasion in sub-Antarctic islands; (ii) explore the relationship between alien species features  
5 and their dependence on anthropogenic propagule pressure; and (iii) unravel key traits conferring  
6 invasiveness in the sub-Antarctic.

## 7 **Location**

8 Possession Island, Crozet archipelago (French sub-Antarctic islands).

## 9 **Taxon**

10 Non-native vascular plants (Poaceae, Caryophyllaceae, Juncaceae).

## 11 **Methods**

12 Single-species distribution models were used to explore the effect of high-resolution topoclimatic and  
13 human-related variables on the occurrence of six of the most aggressive alien plants colonizing  
14 French sub-Antarctic islands. Furthermore, the interaction between alien species traits and their  
15 response to anthropogenic propagule pressure was analysed by means of a multi-species distribution  
16 model. This allowed identifying the features of species that were associated to low dependence on  
17 human-assisted introductions, and were thus potentially more invasive.

## 18 **Results**

19 We observed two main invasion patterns: low-spread species strongly dependent on anthropogenic  
20 propagule pressure and high-spread species limited mainly by harsh climatic conditions. Differences  
21 in invasiveness across species mostly related to their residence time, life history and plant height,  
22 with older introductions, perennial and low-stature species being more invasive.

## 23 **Main conclusions**

24 The availability of high-resolution data improved our understanding of the role of environmental and  
25 human-related factors in driving alien species distribution on sub-Antarctic islands. At the same time,  
26 the identification of alien species features conferring invasiveness may help anticipating future  
27 problematic invasions.

28

29 **Keywords: alien plants, anthropogenic propagule pressure, invasiveness, plant invasion,**  
30 **species distribution models, sub-Antarctic islands, topoclimate**

31 **Running title: plant invasion in sub-Antarctic islands**

32

## 33 1. Introduction

34 Sub-Antarctic islands, archipelagos scattered within the 54-48°S latitudinal ring, are extremely  
35 remote territories which harbour a unique biodiversity with a high degree of endemism (Shaw, 2013).  
36 As a consequence of their relatively recent discovery and environmental harshness, these islands have  
37 long remained pristine and largely free of human disturbances. Yet, due to the gradual relaxation of  
38 these natural barriers, sub-Antarctic islands are now listed among the most threatened environments  
39 on Earth. In particular, invasion by alien plants, boosted by ongoing climate changes and increasing  
40 human disturbances (Duffy & Lee, 2019; Hughes et al., 2019), has become one of the main threats to  
41 the endemic biodiversity of these territories, and is bound to rise in the next decades (Lebouvier et  
42 al., 2011; Hughes, Pertierra, Molina-Montenegro, & Convey, 2015). Over the past century, alien  
43 plants have been increasingly introduced in the sub-Antarctic region (Frenot et al., 2005; Huiskes et  
44 al., 2014). European whalers and scientific activities, respectively in the 19<sup>th</sup> and 20<sup>th</sup> century,  
45 determined the first main introduction events (Convey & Lebouvier, 2009; Shaw, 2013). Later on and  
46 since the mid-twentieth century, climate warming, strong changes in precipitation regimes and the  
47 widespread impacts of non-native vertebrates have progressively favoured the establishment of cold-  
48 tolerant alien plants on sub-Antarctic islands (Shaw, 2013; Pertierra et al., 2017; Duffy & Lee, 2019).  
49 Nevertheless, despite their demonstrated impacts on native biodiversity, little attention has been given  
50 to plant invasions compared to animal invasions on these islands (le Roux et al., 2013), leaving a  
51 knowledge gap in the mechanisms underpinning plant invasion processes in these unique  
52 environments (Greve, Mathakutha, Steyn, & Chown, 2017).

53 The outcome of any biological invasion is jointly determined by propagule pressure (i.e. frequency  
54 of propagules introduction), abiotic conditions (i.e. physico-chemical features of the invaded  
55 environment) and biotic features (i.e. alien species characteristics and interactions with the recipient  
56 community), with anthropogenic disturbances affecting all three (Richardson & Pyšek, 2006; Catford,  
57 Jansson, & Nilsson, 2009; Lembrechts et al., 2016). The relative importance of these factors is,  
58 however, context-dependent and species-specific (Catford et al., 2009). In sub-Antarctic islands, due  
59 to the high specialization but low diversity of the native flora, biotic interactions are thought to play  
60 a minor role (le Roux et al., 2013; Duffy et al., 2017; Moser et al., 2018), so it is mainly the first two  
61 factors that determine the distribution and spread of alien plants. First, invasions depend on human-  
62 induced propagule pressure: the frequency of propagule introduction correlates with the number of  
63 ship landings and is highest in the vicinity of human facilities (Huiskes et al., 2014). Second, local  
64 abiotic conditions are strongly limiting, and particularly the climatic mismatch between the conditions  
65 prevailing within the alien species' native range and the conditions prevailing in the sub-Antarctic  
66 can strongly constrain invasions (Frenot et al., 2005). Some alien plants are more limited during the  
67 introduction phase, while others quickly become relatively independent of human-related propagule-  
68 pressure and seem only climatically limited. Once established, the species which are the least  
69 dependent on continuous introductions are the most likely to spread widely and become invasive  
70 (Richardson & Pyšek, 2006; Catford et al., 2009). Therefore, quantifying the degree of alien species  
71 dependence on propagule pressure might aid at identifying potentially invasive species.

72 A lower dependence on human-related propagule pressure is potentially related to certain species  
73 features which are more generally known to affect invasiveness. First of all, alien species with longer  
74 residence times are more likely to become independent of anthropogenic propagule pressure (Wilson  
75 et al., 2007; Pyšek et al., 2015). Second, certain plant traits are considered key for profiling successful  
76 invaders (Pyšek & Richardson, 2008): invasive alien plants across most environments are growing  
77 faster and taller than non-invasive alien species, and typically produce resource-acquisitive leaves  
78 and many small seeds (van Kleunen, Weber, & Fischer, 2010; van Kleunen, Dawson, & Maurel,

79 2015). More specifically, Mathakutha et al. (2019) performed a first functional comparison between  
80 invasive and non-invasive alien species colonizing the sub-Antarctic Marion Island, reporting that  
81 species generally considered invasive had lower plant height, smaller leaf area, lower frost tolerance  
82 and higher specific leaf area than other alien species. Nevertheless, it is still unclear which traits can  
83 actually make some alien plants less dependent on human-related propagule pressure, and thus more  
84 likely to become invasive, especially in the sub-Antarctic islands. This knowledge could facilitate the  
85 early screening of highly invasive alien plant species in these environments (Frenot et al., 2005;  
86 Mathakutha et al., 2019).

87 Correlative species distribution models (SDMs) are statistical tools that model the species-  
88 environment relationship relying on geo-referenced occurrence data and spatial environmental layers  
89 (Guisan, Thuiller, & Zimmermann, 2017). Such models already proved to be valuable tools for  
90 analysing alien plant invasion in Antarctica and the sub-Antarctic regions. For instance, Pertierra et  
91 al. (2017) modelled the distribution of *Poa annua* and *Poa pratensis* in the Antarctic peninsula as a  
92 function of bioclimatic variables, while Duffy et al. (2017) generated future scenarios of invasion  
93 across Antarctica and the sub-Antarctic regions using climate-based SDMs. Whilst these previous  
94 SDM applications have revealed large-scale determinants of alien plant invasion in the Antarctic  
95 biogeographic region, they have up till now failed to account for how environmental and  
96 anthropogenic factors regulate alien plant distributions at a spatial resolution that is meaningful for  
97 local management. This is chiefly due to the lack of high-resolution environmental (e.g. climatic,  
98 topographic) and human-related data layers, which limits the implementation of SDMs at fine spatial  
99 resolutions in remote areas (Gutt et al., 2012). A more general limitation inherent to the use of SDMs  
100 for modelling biological invasion is that SDMs allow mapping into the geographical space only a  
101 snapshot of the current alien species-environment relationship net of dispersal and biotic constraints  
102 (i.e. realized distribution), while necessarily underestimating the actual area potentially suitable to a  
103 species for establishing and maintaining a viable population (i.e. potential distribution; see Jiménez-  
104 Valverde et al., 2011 and Srivastava, Lafond, & Griess, 2019).

105 The sub-Antarctic Possession Island constitutes an ideal arena to analyse alien plant invasions in the  
106 sub-Antarctic region. The availability of historical vegetation observations allows retracing the  
107 invasion history of most alien plant species on the island. Moreover, this island witnessed past human  
108 colonization and climate changes comparable to the other sub-Antarctic islands, allowing inference  
109 on the mechanisms underpinning alien plant invasion in these unique areas. Previous work showed  
110 that there is considerable variation in the spread of alien plants established on Possession Island, with  
111 some species clustering close to their introduction locations and others spreading widely and far from  
112 the initial introduction sites (Frenot et al., 2005), which allows testing for differences in the  
113 dependence on human introductions. In the present study, we model the distribution of the most  
114 relevant alien plant species colonizing Possession Island using a combination of environmental and  
115 human-related spatial data derived at an unprecedented high spatial resolution (i.e. 30-m) for these  
116 latitudes that we related to long-term monitoring observations of plant occurrences. Our aim is to test  
117 the local effect of environmental and anthropogenic factors on alien plant invasion in sub-Antarctic  
118 ecosystems. We hypothesise that both abiotic and human-related factors jointly define the local  
119 occurrence of alien plant species, but that these two factors will not be equally important among  
120 species. Furthermore, to identify plant characteristics conferring high invasiveness in sub-Antarctic  
121 ecosystems, we investigate how plant functional traits affect species dependence on anthropogenic  
122 propagule pressures. In this regard, our working hypothesis is that the most invasive species share  
123 specific functional characteristics allowing them to become independent of human-assisted  
124 introductions and spread widely once established.

125

## 126 2. Materials and methods

### 127 2.1 Study area

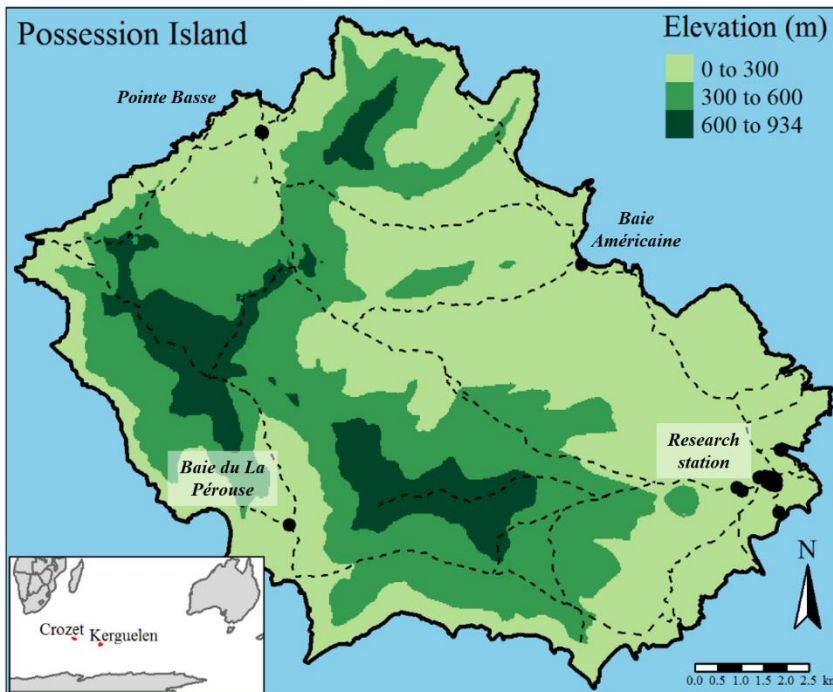

128

129 *Figure 1 – Map of Possession Island showing: gross topography using three altitudinal belts (0-300 m; 300-600 m; 600-*  
130 *934 m); human settlements (black dots); and hiking paths (dashed lines). The inset map reports the geographical location*  
131 *of French sub-Antarctic islands, which include Crozet and Kerguelen archipelagos.*

132 The study was carried out on Possession Island in the Crozet archipelago, which is included in the  
133 *Réserve naturelle nationale des terres australes françaises* (RNN TAF) and listed as UNESCO World  
134 Heritage site since 2019. Possession Island (Figure 1) is characterized by a complex topography, with  
135 an altitudinal gradient ranging from 0 to 934 m above the sea level (*Pic du Mascarin*) over a relatively  
136 short spatial extent (147 km<sup>2</sup>). The island is characterized by a typical sub-Antarctic climate, with  
137 mean annual temperature of 5.6 °C and annual precipitation of 2,300 mm (Météo France, data: 1960-  
138 2019). Frequent and strong western winds occur throughout most of the year.

139 The first human settlements date back to the 19<sup>th</sup> century, when whalers and sealers established on  
140 the north-east side of the island during the hunting season, facilitating a first series of alien species  
141 introductions. In 1963, a permanent research station (*Alfred Faure*, hereafter the ‘research station’)  
142 was built on the easternmost area of Possession Island, fostering a new invasion front. Beyond the  
143 research station, other shelters (inhabited for short periods) are currently present on each side of the  
144 island: north (*Pointe Basse*); south-west (*Baie du La Pérouse*); and north-east (*Baie Américaine*).  
145 Among these, the research station is by far the biggest human settlement and main hub of propagule  
146 introduction. The vegetation at Possession Island has experienced relatively low grazing pressure  
147 from sheep in the past (Convey & Lebouvier, 2009), in comparison to other sub-Antarctic islands  
148 where introduced large herbivores still strongly affect the distribution of alien plants (Shaw, 2013).

### 149 2.2 Study species

150 Despite the 68 alien species recorded on Possession Island (see page 99 of the RNN TAF management  
151 plan 2018-2027: [https://taaf.fr//content/uploads/sites/2/2019/09/180607-Volet-A\\_pour-CNPN.pdf](https://taaf.fr//content/uploads/sites/2/2019/09/180607-Volet-A_pour-CNPN.pdf)),

152 only few have established persistent populations (Frenot, Gloaguen, Massé, & Lebouvier, 2001). In  
153 this study, we restricted our analysis to those alien plants that are either known to be generally  
154 widespread on sub-Antarctic islands or are particularly widespread on Possession Island, and for  
155 which sufficient occurrence data were available (total number of presences > 100). Specifically, we  
156 selected the following six species from three different families: *Poa annua* and *Poa pratensis*  
157 (Poaceae); *Cerastium fontanum*, *Sagina procumbens* and *Stellaria alsine* (Caryophyllaceae); and  
158 *Juncus bufonius* (Juncaceae). The two grasses, *P. annua* and *P. pratensis*, have colonised most of the  
159 sub-Antarctic islands (Shaw, 2013) and are the longest-established alien plants in the Antarctic  
160 Peninsula (Perterra et al., 2017). *Cerastium fontanum* and *S. procumbens* are currently widely  
161 distributed in this environment (Frenot et al., 2005; Shaw, 2013) with, in particular, *S. procumbens*  
162 exhibiting the highest rate of spread among the alien plants of Marion and Prince Edward Islands (le  
163 Roux et al., 2013). Finally, both *J. bufonius* and *S. alsine* currently occur at significant distances from  
164 the research station on Possession Island (Frenot et al., 2001). While the former has been recently  
165 observed up to the Maritime Antarctica latitudes (Cuba-Díaz, Fuentes, & Rondanelli-Reyes, 2015),  
166 the latter has been singled out by some authors as the potentially most problematic future invasive  
167 plant species on Possession Island (Frenot et al., 2001; Convey, Key, & Key, 2010).

#### 168 2.2.1 Species distribution data

169 We analysed the invasion patterns of the six selected alien plant species relying on georeferenced  
170 occurrence (presence/absence) data collected within the context of a yearly vegetation monitoring  
171 survey carried out by the RNN TAF since 2010. The vegetation sampling is implemented within a  
172 system of 675 squared cells of 100 × 100 m each, where floristic data (presence and abundance of  
173 vascular plant species) are collected along with habitat characteristics through phytosociological  
174 *relevés* (Dengler, 2016). In this study, we used data collected from 2010 to 2017 (3,354 occurrences  
175 for the selected species across 1,572 sampled plots).

#### 176 2.2.2 Species features and functional trait data

177 To inform species features (e.g. traits) potentially related to invasiveness, we collected data on plants  
178 residence time and functional traits. Residence time positively interacts with propagule pressure in  
179 determining plant invasion success (Richardson & Pyšek, 2006; Lockwood, Cassey, & Blackburn,  
180 2005; Pyšek et al., 2015), and this relationship was also observed on sub-Antarctic islands (le Roux  
181 et al., 2013; Shaw, 2013; Mathakutha et al., 2019). To test how residence time influences alien  
182 species' dependence on propagule pressure, we considered the introduction date of the selected plants  
183 on Possession Island (Frenot et al., 2001) and used this information to assign them to two groups: old  
184 *vs* new resident species (Appendix S1, Table S1.1). In particular, we considered as old resident  
185 species those which were firstly observed on Possession Island before the research station was built  
186 (1963), while referring to the others as new resident species.

187 We then collated data on seven plant traits commonly used to synthesize species strategies known to  
188 be related to invasiveness (van Kleunen et al., 2010; van Kleunen et al., 2015): (1) life history (annual  
189 *vs* perennial); (2) plant height; (3) leaf area; (4) specific leaf area (SLA); (5) vegetative reproduction  
190 (present *vs* absent, i.e. sexual and vegetative *vs* only sexual reproduction); (6) seed dry mass; and (7)  
191 number of seeds per plant. We excluded traits related to flowering since pollinating insects are absent  
192 from almost all sub-Antarctic islands (Convey et al., 2010). Life history, plant height and leaf area  
193 relate to plant persistence and tolerance to environmental stress (Cornelissen et al., 2003; Pérez-  
194 Harguindeguy et al., 2013). In addition, life history is used to assess maximum lifespan and plant  
195 height is associated with competitiveness for light and whole plant fecundity (Pérez-Harguindeguy et  
196 al., 2013). Specific leaf area is the one-sided leaf area per leaf mass and is associated with resource



197 acquisition and photosynthetic rate (Pérez-Harguindeguy et al., 2013). Reproduction strategy, seed  
198 dry mass and number of seeds per plant do not only relate with species persistence, but also with  
199 dispersal capacity (Ottaviani et al., 2020). In particular, alien species reproducing predominantly  
200 sexually may benefit from lower dispersal limitation and greater genetic diversity (van Kleunen et  
201 al., 2015). At the same time, while small and light seeds are better dispersed at longer distances, large-  
202 seeded plants may benefit from more stored resources (van Kleunen et al., 2015).

203 Functional trait data collected in areas environmentally analogous to Possession Island were compiled  
204 from the literature (other sub-Antarctic islands, Frenot et al., 2005; Marion Island, Mathakutha et al.,  
205 2019). Whenever we could not find information collected in comparable environments, we relied on  
206 functional trait data included in the TRY database (Kattge et al., 2020). For each alien species, the  
207 dominant reproduction strategy in the study area was assessed relying on expert-based knowledge  
208 (personal communication, Lebouvier, M., & Bittebiere, A.K.). Species-specific values of the  
209 functional traits are reported in table S1.1 (Appendix S1) along with literature sources.

### 210 2.3 Topoclimatic layers

211 To model the species-environment relationship at fine spatial resolution, we first downloaded coarse-  
212 grained temperature (BIO1, BIO5 and BIO6 – annual mean temperature, max temperature of the  
213 warmest month and min temperature of the coldest month) and annual precipitation (BIO12) grid  
214 layers at 1-km resolution (at the equator) from the CHELSA database (Karger et al., 2017) and then  
215 disaggregated their spatial resolution using physiographically informed models fitted through  
216 geographically weighted regression (GWR; Fotheringham & Rogerson, 2008). This downscaling  
217 technique allows statistically predicting the local value of the coarse-grain CHELSA climatic  
218 variables as a function of environmental grid layers available at finer spatial resolution (in this study  
219 30-m at the equator, hereafter 30-m) and known to drive microclimate heterogeneity (Lenoir, Hattab,  
220 & Pierre, 2017; Lembrechts et al., 2019). GWR-derived topoclimatic layers, beyond allowing to  
221 model the species-environment relationship at a more meaningful spatial resolution, have already  
222 proved to better account for the complex interactions between macroclimate and topography (Lenoir  
223 et al., 2017; Lembrechts et al., 2019).

224 As using BIO5 (max temperature of the warmest month) and BIO6 (min temperature of the coldest  
225 month) in place of BIO1 did not improve species distribution models, we ultimately used BIO1  
226 (hereafter mean temperature) and BIO12 as topoclimatic predictors. A full description of the  
227 downscaling procedure is reported in Appendix S2 along with the results of the GWR models.

### 228 2.4 Human-related layers

229 As human disturbances are known to favour the establishment of alien plants through propagule  
230 introduction and alteration of habitat conditions, we generated a 30-m resolution layer reporting the  
231 distance between each human settlement (the research station, *Baie du La Pérouse*, *Pointe Basse* and  
232 *Baie Américaine*) and any location on the island. Specifically, assuming that human disturbance is  
233 stronger in more accessible areas, we derived a least cost distance grid layer providing a measure of  
234 accessibility. Terrain slope changes between both orthogonally and diagonally neighbouring raster  
235 cells were used to compute the cost of reaching any location on Possession Island starting from any  
236 human settlement and following all potential paths of raster cells (function “accCost”, “gdistance” R  
237 package; Etten, 2018). High costs were thus associated with locations not easily reachable from  
238 human settlements due to high topographic roughness (Appendix S3, Figure S3.2).

239 A network of hiking paths has been designed by RNN TAF to restrict human movements for wildlife  
240 conservation purposes, and walking these paths currently constitutes the only authorized way to move

241 across the island. As humans are a critical vector of propagule introduction and dispersal on sub-  
242 Antarctic islands, we derived a 30-m resolution raster layer reporting the distance between any  
243 location on Possession Island and the closest hiking path using the function “distance” from the  
244 “raster” R package (Hijmans, 2019) (Appendix S3, Figure S3.2).

## 245 *2.5 Alien species distribution modelling*

246 The occurrence probability of the six studied alien plant species was separately modelled as a function  
247 of the topoclimatic (mean temperature and annual precipitation) and human-related variables (path  
248 distance and least cost) by means of logit binary generalized linear models (GLM). The single-species  
249 distribution models (single-SDMs) were trained and tested on datasets obtained through a re-sampling  
250 procedure of the presence/absence data performed in the environmental space to reflect all available  
251 environmental conditions on Possession Island (Lenoir et al., 2010; Hattab et al., 2017; see Appendix  
252 S4). All four topoclimatic and human-related predictors were retained to fit the single-SDMs as the  
253 relative variance inflation factor (function “vif”, R package “car”; Fox & Weisberg, 2019) was always  
254 below a threshold of 3. Second-order polynomial terms were included in the model to allow for  
255 intermediate niche optima of the species or in case lack-of-fit tests detected consistent departure from  
256 linearity in the profile of Pearson residuals (function “residualPlots”, R package “car”; Fox &  
257 Weisberg, 2019). The statistical significance of each predictor was tested using type II analysis of  
258 deviance (function “Anova”, R package “car”; Fox & Weisberg, 2019). We then computed the  
259 likelihood profile-based 95% confidence intervals of the regression parameters.

260 Single-SDMs predictive performance was measured using the true skill statistic (TSS, equal to  
261 sensitivity + specificity – 1; function “ecospat.max.tss”, R package “ecospat”; Broennimann, Di Cola,  
262 & Guisan, 2018) computed on the testing datasets obtained through the environmental matching  
263 described in Appendix S4. We used the TSS as it has desirable properties of other accuracy measures  
264 (e.g. Kappa and AUC), while being unaffected by prevalence (Allouche, Tsoar, & Kadmon, 2006).  
265 Also, we computed the deviance-based  $R^2$  value as a measure of goodness-of-fit of each single-SDM.

266 The occurrence probability estimated by the full single-SDMs (including both topoclimatic and  
267 human-related predictors) for each alien plant species was mapped on a 30-m raster grid layer to  
268 visualise their predicted distribution across Possession Island.

## 269 *2.6 Relationship between plant traits and alien species dependence on propagule pressure*

270 As preliminary analyses, we measured the relative importance of human-related variables in  
271 determining alien species occurrence in the single-SDMs. To this aim, we used the sum of Akaike  
272 weights ( $w$ ), which provides an easily interpretable measure of variable importance (it ranges from 0  
273 to 1, with a high value for a given variable indicating its high importance relative to the others;  
274 Burnham & Anderson, 2002). Then we graphically related the species-specific values of the  
275 functional traits to the sum of weights to look for relationships between plant traits and the importance  
276 of human-related variables (see Appendix S7).

277 Secondly, we investigated how the interaction between human-related variables and plant traits  
278 affected alien species occurrence in a multi-species distribution model (multi-SDM), focusing on  
279 those functional traits that showed some relationship with the dependence on human-related variables  
280 in the single-SDMs. To this aim, we modelled the occurrence of all alien species together as a function  
281 of topoclimatic and human-related variables by means of a logit binary GLM, including the  
282 interaction between species identity and topoclimatic variables on the one hand and the interaction  
283 between species functional traits and human-related variables on the other hand. This allowed  
284 exploring how the effect of human-related variables on alien species occurrence varied according to

285 plant traits, while controlling for species-specific responses to topoclimate. To select the most  
286 parsimonious model, we fitted all possible sub-models including different combinations of the  
287 functional traits-anthropogenic variables interaction terms (function “dredge”, R package “MuMIn”;  
288 Barton, 2019), always retaining the species-topoclimate interaction terms and the main effect of path  
289 distance and least cost in each candidate sub-model. Then, we computed the sum of Akaike weights  
290 for each model term and used the evidence ratio as a measure of the relative importance of variables  
291 (Massol et al., 2007; Burnham & Anderson, 2002). Specifically, we computed the evidence ratio of  
292 the *i*-th variable ( $ER_i$ ) as the odds of its sum of Akaike weights:

$$293 \quad ER_i = \frac{w_i}{I - w_i}$$

294 The evidence ratio was then compared with its expected value ( $ER_{null}$ ) under the “null hypothesis”  
295 that the variable explained as much deviance as a randomly generated explanatory variable, and  
296 would thus be as likely as not to be incorporated in the best models. As all the variables were tested  
297 in a balanced design,  $ER_{null} = 1$  in all tested cases. Following Massol et al. (2007), the effect of a  
298 variable *i* was deemed unlikely if  $ER_i < 0.37 \times ER_{null}$ , implausible when  $0.37 \times ER_{null} < ER_i < ER_{null}$ ,  
299 plausible when  $ER_{null} < ER_i < 2.72 \times ER_{null}$ , and likely when  $ER_i > 2.72 \times ER_{null}$ . These thresholds  
300 correspond to differences in Akaike information criterion equal to +2 or -2, which are commonly  
301 admitted as a good rule-of-thumb gap to compare model performance.

### 302 3. Results

#### 303 3.1 Effect of topoclimatic and human-related variables on single species distribution

304 Predictive performances of the single-SDMs varied greatly across species (Table 1): high values of  
305 TSS were observed for *P. pratensis*, *S. alsine* and *J. bufonius* (0.80-0.82), while low values were  
306 obtained for the remaining species (from 0.09 to 0.29). The  $R^2$  values showed a similar trend, with  
307 the highest value obtained for *J. bufonius* (0.48) and the lowest for *C. fontanum* (0.02).

308 Overall, the occurrence of *P. pratensis*, *S. alsine* and *J. bufonius* appeared to be strongly conditioned  
309 by both topoclimatic and human-related variables, while *C. fontanum*, *P. annua* and *S. procumbens*  
310 were less affected by human-related variables (Table 1, Figures 2 and 3).

311 All alien species, except *S. alsine*, exhibited a significant positive or humped-shaped relationship with  
312 mean temperature (Table 1), meaning that their occurrence probability increased with increasing  
313 temperature (Figure 2, Appendix S5). More specifically, the occurrence probability of *J. bufonius*, *S.*  
314 *procumbens* and *C. fontanum* peaked at mean temperature values around 4.5 °C, while the presence  
315 of *P. pratensis* and *P. annua* increased more or less linearly with temperature.

316 Annual precipitation significantly affected the presence of *P. pratensis*, *S. alsine* and *J. bufonius*,  
317 while it had a minor influence on the occurrence of the other species (Table 1). In particular, the odds  
318 of finding *P. pratensis* and *J. bufonius* decreased approximately by 90% for each 500 mm increment  
319 in annual precipitation, while the occurrence probability of *S. alsine* sharply decreased for annual  
320 precipitation values above 1,500 mm (Figure 2).

321 All species except *C. fontanum* exhibited a significant negative relationship with path distance (i.e.  
322 the occurrence probability of the species decreased at increasing distances from the hiking paths),  
323 though its influence varied among species (Table 1, Figure 2, Appendix S5). In this regard, the odds  
324 of finding *P. pratensis*, *S. alsine* and *J. bufonius* decreased respectively by 20%, 16% and 19%  
325 moving 100 m away from the paths, while the odds of finding *P. annua* and *S. procumbens* decreased  
326 by 4% and 6%, respectively.

327 Least cost distance to settlements appeared to influence the occurrence of all analysed species except  
328 *S. procumbens* (Table 1). In particular, the odds of finding *P. pratensis*, *S. alsine* and *J. bufonius*  
329 decreased, respectively, by 17%, 13% and 44% for each increment of 5,000 units of cost of travelling  
330 a given path from a human settlement (Figure 2, Appendix S5). On the contrary, *C. fontanum* and *P.*  
331 *annua* showed a positive relationship with least cost, with their odds of occurring increasing  
332 respectively by 9% and 5% for each increment of 5,000 units of cost of travelling a given path from  
333 a human settlement (Figure 2 and Appendix S5).

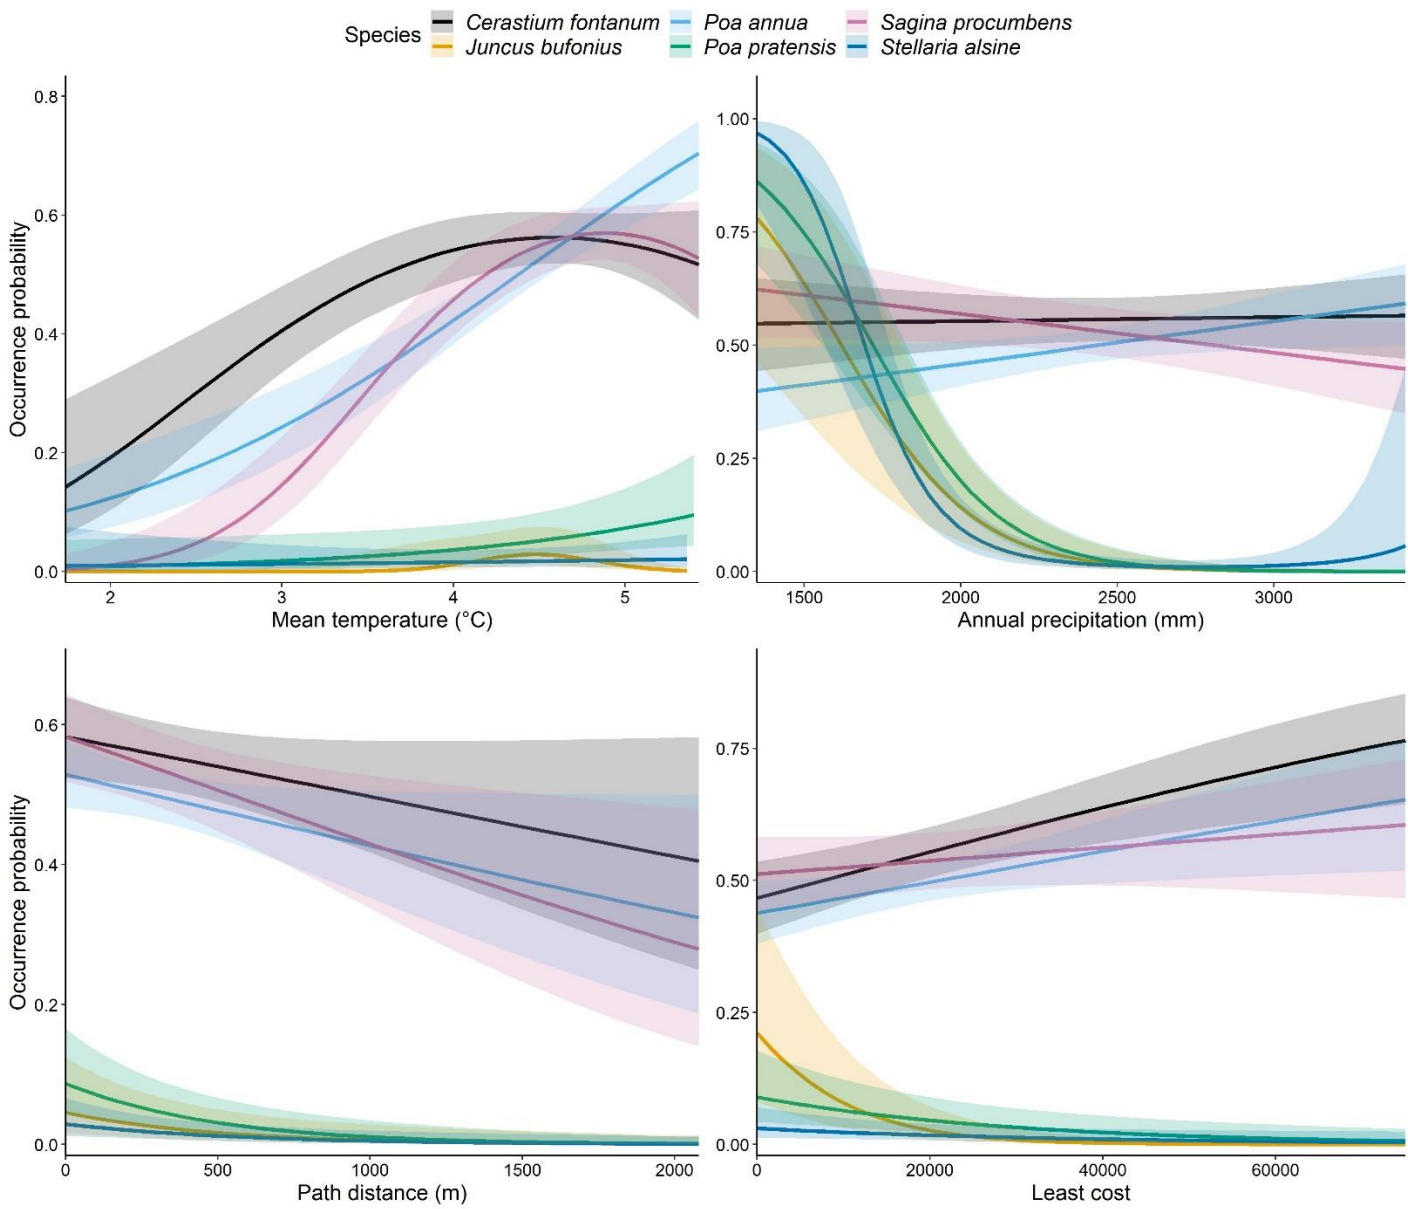

Figure 2 – Response curves of the analysed alien species in the single-SDMs.

336 Table 1 – Single-SDM type II analysis of deviance tables and performance measures ( $R^2$  and TSS). LR: Likelihood Ratio statistic; Df: degrees of freedom; p-val: p-value (\*\*\*)  $p <$   
 337 0.001; \*\*  $p < 0.01$ ; \*  $p < 0.05$ ).

| Predictors                  | <i>Poa pratensis</i> |    |       | <i>Juncus bufonius</i> |    |       | <i>Stellaria alsine</i> |    |         | <i>Poa annua</i> |    |       | <i>Sagina procumbens</i> |    |         | <i>Cerastium fontanum</i> |    |         |
|-----------------------------|----------------------|----|-------|------------------------|----|-------|-------------------------|----|---------|------------------|----|-------|--------------------------|----|---------|---------------------------|----|---------|
|                             | LR                   | Df | p-val | LR                     | Df | p-val | LR                      | Df | p-val   | LR               | Df | p-val | LR                       | Df | p-val   | LR                        | Df | p-val   |
| <b>Mean temperature</b>     | 5.083                | 1  | *     | 32.516                 | 2  | ***   | 0.312                   | 1  | = 0.576 | 55.538           | 1  | ***   | 62.554                   | 2  | ***     | 18.325                    | 2  | ***     |
| <b>Annual precipitation</b> | 106.443              | 1  | ***   | 73.647                 | 1  | ***   | 68.406                  | 2  | ***     | 4.759            | 1  | *     | 3.681                    | 1  | = 0.055 | 0.041                     | 1  | = 0.840 |
| <b>Least cost</b>           | 10.837               | 1  | ***   | 40.250                 | 1  | ***   | 4.420                   | 1  | *       | 5.778            | 1  | *     | 1.118                    | 1  | = 0.290 | 12.483                    | 1  | ***     |
| <b>Path distance</b>        | 15.623               | 1  | ***   | 8.740                  | 1  | **    | 7.524                   | 1  | **      | 3.927            | 1  | *     | 6.782                    | 1  | **      | 2.877                     | 1  | = 0.089 |
| <b><math>R^2</math></b>     |                      |    | 0.46  |                        |    | 0.48  |                         |    | 0.36    |                  |    | 0.06  |                          |    | 0.10    |                           |    | 0.02    |
| <b>TSS</b>                  |                      |    | 0.80  |                        |    | 0.81  |                         |    | 0.82    |                  |    | 0.19  |                          |    | 0.29    |                           |    | 0.09    |

338

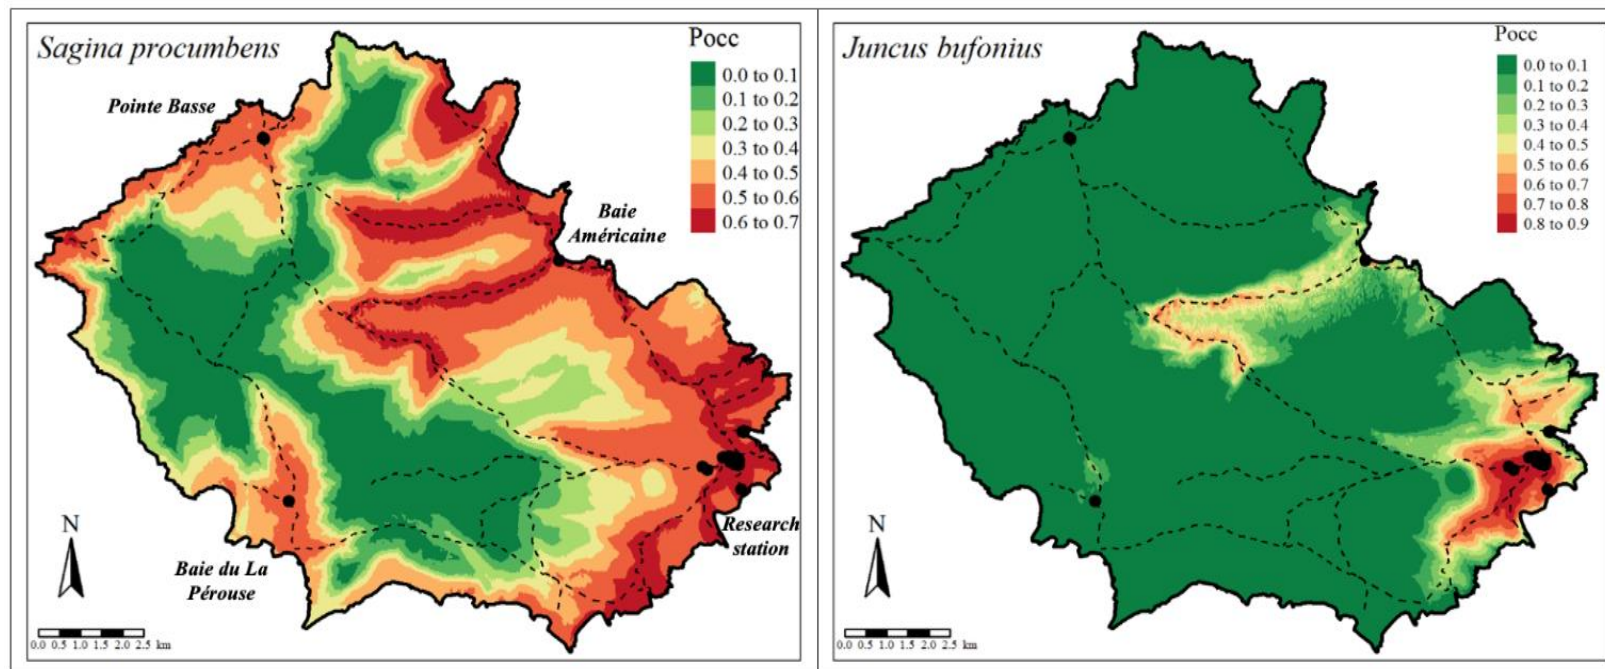

339

340 Figure 3 – Predicted occurrence of *Sagina procumbens* and *Juncus bufonius*. Pocc: occurrence probability. Dashed lines represent hiking paths, while black dots represent human  
 341 settlements. Occurrence maps of the other alien species are reported in Appendix S6 (Figure S6.4 and S6.5).

342 *3.2 Plant traits and species dependence on propagule pressure*

343 In the preliminary analyses, residence time, life history, vegetative reproduction and plant height  
344 showed some relationship with the sum of weights of the human-related variables in the single-SDMs  
345 (Appendix S7, Figure S7.6 and S7.8), while seed- and leaf-related traits clearly showed no  
346 relationship (Appendix S7, Figure S7.7 and S7.9).

347 Then, the multi-SDM confirmed significant interactions of residence time, life history and plant  
348 height with the human-related variables (Appendix S7, Figure S7.10). Residence time and plant  
349 height appeared to interact with both human-related variables, while life history seemed to interact  
350 only with least cost in determining alien species occurrence. In particular, the effect of human-related  
351 variables on alien species occurrence varied with plant height. For instance, the occurrence  
352 probability of taller plants sharply decreased when moving away from human facilities, while a  
353 weaker and sometimes opposite trend was observed for plant species of shorter statures (Figure 4a,b  
354 and Appendix S7, Figure S7.11). In addition, old residents were on average less affected by the  
355 human-related variables than new residents (Figure 4a,b and Appendix S7, Figure S7.11a). Finally,  
356 perennials appeared to be on average less negatively affected by least cost distance to human  
357 settlements than annuals (Figure 4c and Appendix S7, Figure S7.11b,c).



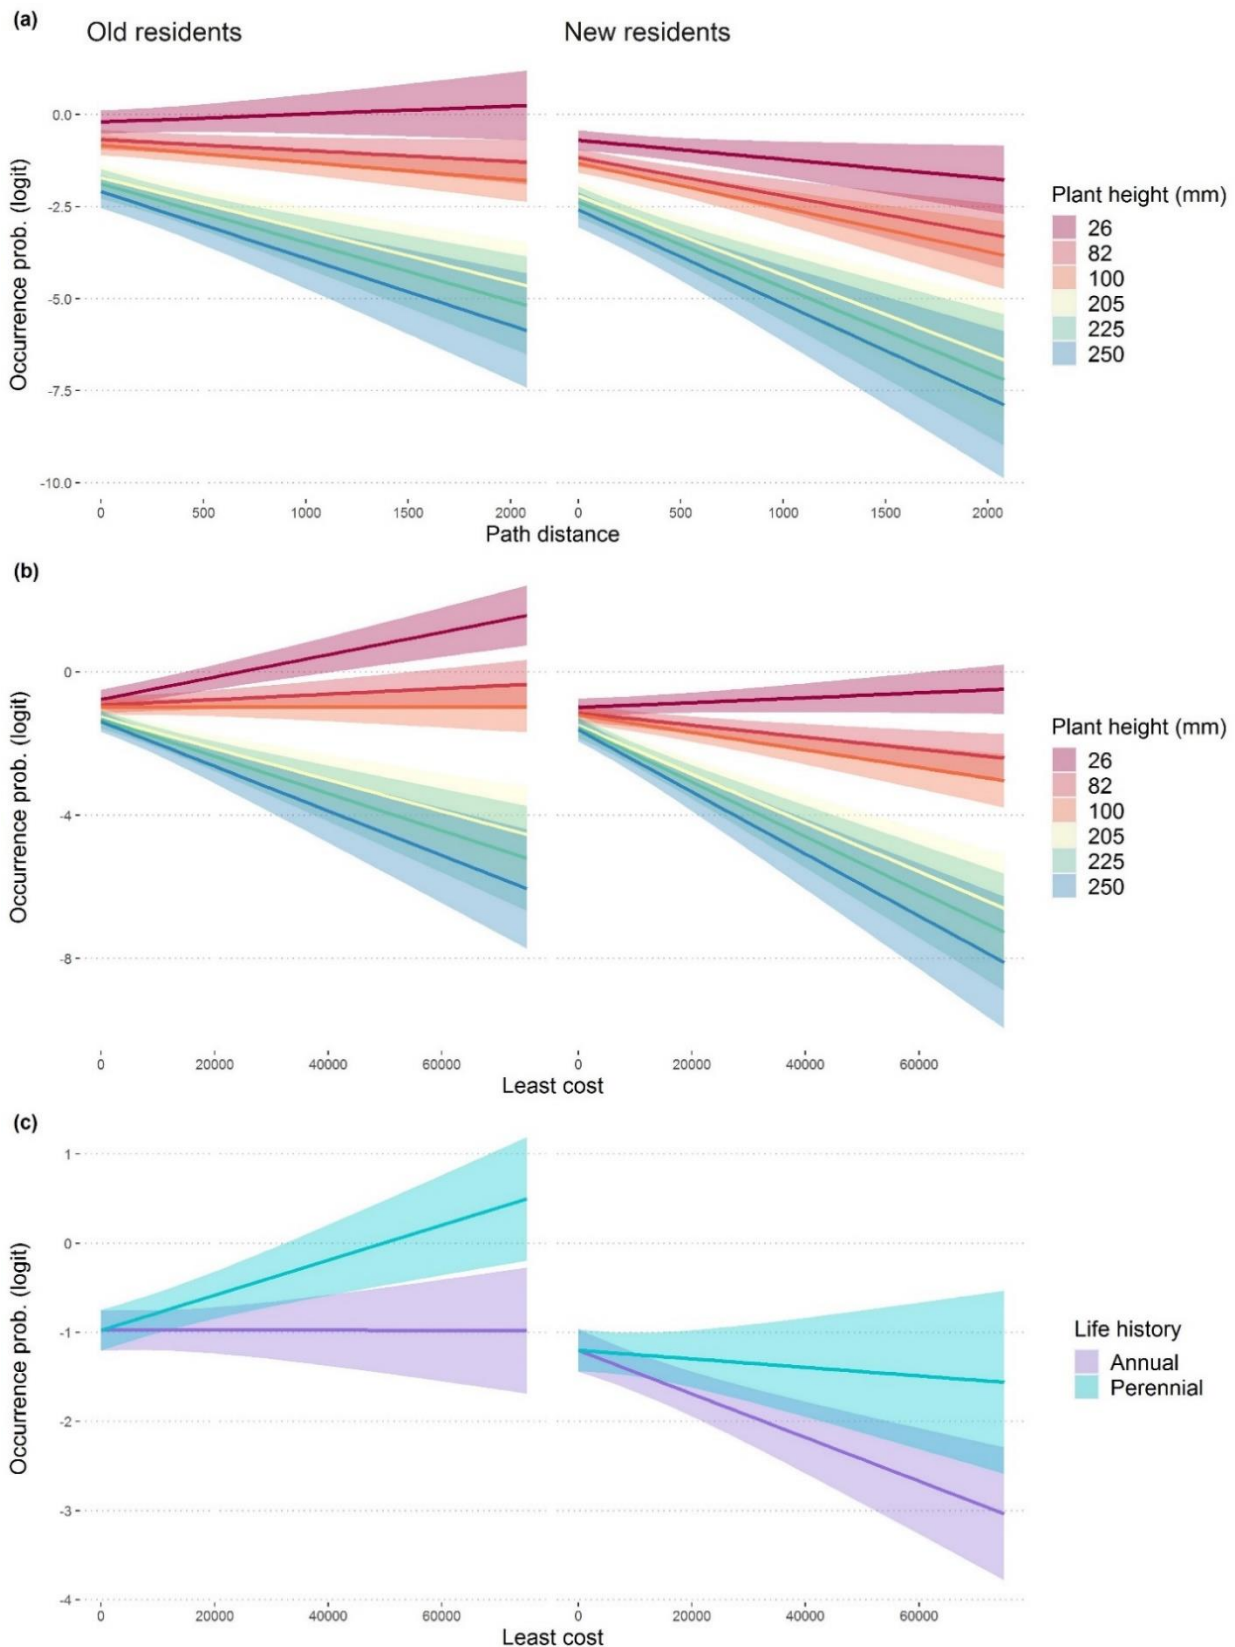

358

359 *Figure 4 – Effect of the interaction between human-related variables and plant features on alien species occurrence*  
360 *probability (logit scale). Panel (a): effect of the path distance-plant height interaction on old and new resident occurrence*  
361 *probability. Panel (b): effect of the least cost-plant height interaction on old and new (annual) resident occurrence*  
362 *probability. Panel (c): effect of least cost distance to human settlements on annual and perennial (100 mm height) alien*  
363 *species occurrence (for both old and new residents). All plots are reported on a logit scale.*

364

#### 365 4. Discussion

366 As hypothesised, both environmental and human-related variables locally affected alien plant species  
367 occurrence on Possession Island, though with differences among the studied species. Overall, results  
368 confirmed the key role of human-related propagule pressure in favouring alien plant species  
369 establishment and spread on sub-Antarctic islands (Frenot et al., 2005; le Roux et al., 2013; Shaw,  
370 2013), though we also observed a significant effect of abiotic conditions. Indeed, climate barriers  
371 seemed to prevent alien plant species occurrence in the most environmentally stressful areas of the  
372 island, as found in sub(ant)arctic mountain regions by Lembrechts et al. (2016). In particular, our  
373 results suggested the existence of two main invasion patterns arising from the species-specific  
374 dependence on human-related propagule pressure (Frenot et al., 2005; Shaw, 2013): low-spread  
375 species (*P. pratensis*, *S. alsine* and *J. bufonius*) strongly relying on human-assisted dispersal along  
376 hiking trails and in the vicinity of human settlements; and high-spread species (*C. fontanum*, *P. annua*  
377 and *S. procumbens*) mostly limited by harsh climatic conditions at high altitudes. Differences in plant  
378 invasiveness appeared to be influenced by residence time, life history and plant height, with old  
379 residents and perennial short species being more invasive.

380 Due to their dependence on human-related variables, low-spread species were predicted to occur  
381 mainly close to hiking paths and human settlements, pointing to the importance of anthropogenic  
382 activities as key drivers of continuous propagule pressure favouring species establishment (Whinam  
383 et al., 2005; Pickering & Mount, 2010). Once introduced through ship-to-shore transport, propagules  
384 are then likely to be dispersed on hiking paths through trampling (Whinam et al., 2005). However,  
385 the harsher environmental conditions characterizing the west side of Possession Island also limit the  
386 occurrence of low-spread species to the east. In particular, the west-east gradient of annual  
387 precipitation (Appendix S2, Figure S2.1) clearly overlaps with the low-spread species distribution  
388 (Figure 3 and Appendix S6), suggesting that their establishment might be prevented in areas with  
389 abundant precipitation. Nevertheless, the precipitation gradient is also connected to human presence,  
390 so that in the western side of the island (less inhabited and more preserved) anthropogenic propagule  
391 pressure is weaker. In any case, our results evidenced that low-spread species may lack important  
392 adaptations to successfully colonise less disturbed areas with limiting abiotic conditions, while  
393 remaining relegated to areas of high human presence.

394 On the contrary, high-spread species appeared weakly (yet positively) influenced by human-related  
395 variables, suggesting that, in spite of the undisputed importance of anthropogenic activities in  
396 promoting alien plants establishment (Whinam et al., 2005; Huiskes et al., 2014), high-spread species  
397 may possess key traits releasing them from direct dependence on anthropogenic propagule pressure.  
398 Consequently, these species appeared to be mostly limited by the extreme climatic conditions of the  
399 high and cold inner sectors of Possession Island. This result is in line with the findings from  
400 Chwedorzewska et al. (2015), who documented the rapid expansion of *Poa annua* from the Arctowski  
401 research base (King George Island) towards wilder areas of the maritime Antarctic Peninsula.  
402 Nevertheless, the low predictive performance of high-spread SDMs indicates that the occurrence of  
403 these species is poorly explained by the influence of topoclimatic and human-related variables, so  
404 that other factors not considered here (e.g. soil properties, plant-soil microbiota interactions, snow  
405 cover) may play an important role in driving their distribution at even finer spatial resolutions. In this  
406 regard, better performances of the SDMs for high-spread species could have probably been achieved  
407 using alien species abundances, which are more informative of the relative habitat suitability than  
408 presence-absence data (Howard et al., 2014).

409 Critically, although we managed to obtain relatively high-resolution topoclimatic data, it is important  
410 to realize that the CHELSA climate for the island (1) might lack the accuracy it has at temperate  
411 latitudes, being based on extrapolations from a single weather station, and (2) represents air  
412 temperature only, while short plants as those analysed here relate more strongly to soil and near-  
413 surface temperatures (Convey, Coulson, Worland, & Sjöblom, 2018; Lembrechts et al., 2019). This  
414 highlights the need for *in-situ* soil- and near-surface temperature measurements in remote locations  
415 to get more ecologically meaningful climate data (Lembrechts et al., 2020).

416 Although the small set of analysed alien plant species calls for caution in interpretation, we confirmed  
417 here that certain plant traits confer greater invasiveness in sub-Antarctic environments. By relating  
418 plant traits to species responses to human-related variables and analysing the effect of their interaction  
419 on alien species occurrence, we found evidence that low-stature was a key feature that discriminated  
420 invasive from non-invasive alien plant species under the harsh abiotic conditions of Possession Island.  
421 Noteworthy, residence time and life history also appeared to affect species invasiveness.

422 As similarly reported by Mathakutha et al. (2019), we found that high-spread species were of shorter  
423 statures than low-spread species. Consistently, we observed a sharper decrease in the occurrence  
424 probability of taller plants moving away from both hiking paths and human settlements. As plant  
425 height is generally associated with species adaptations to harsh environments (Cornelissen et al.,  
426 2003) and, specifically, low-stature has been attributed to frost avoidance mechanisms in high  
427 mountains (Márquez, Rada, & Fariñas, 2006; Ladinig, Hacker, Neuner, & Wagner, 2013), species of  
428 shorter statures may be reasonably favoured in windy and cold sub-Antarctic environments  
429 (Mathakutha et al., 2019) and therefore be more easily released of human dependence. Indeed, the  
430 importance of functional traits providing tolerance to abiotic stress increases with environmental  
431 harshness, even under strong anthropogenic disturbance (Zefferman et al., 2015). Further, our results  
432 supported the hypothesis that residence time positively affects invasiveness (Lockwood et al., 2005;  
433 Pyšek et al., 2015), though with some exceptions. Generally, old residents (e.g. *C. fontanum* and *P.*  
434 *annua*) were less dependent on human-related propagule pressure and more widely spread than new  
435 resident species. Nevertheless, among the old residents, *P. pratensis* was strongly dependent on  
436 human-related variables and was still mostly restricted to the original introduction sites. On the other  
437 hand, *S. procumbens*, a new resident, has been able to spread extensively and quicker than the other  
438 (old residents) high-spread species. However, this might be due to the difference in plant height of  
439 the two species: while *P. pratensis* is among the tallest analysed species, *S. procumbens* is the  
440 shortest. The multi-SDM showed that perennials were slightly less dependent on human presence  
441 than annuals (Figure 4c). Although annuals might benefit from high dispersal abilities (e.g. abundant  
442 light seeds) and usually spread quicker and wider (Perterra et al., 2017), perennials can sustain short  
443 growing seasons (Frenot et al., 2001; Shaw, 2013) and potentially colonise harsher environments  
444 (Dietz & Edwards, 2006). In our case, short perennials (e.g. *C. fontanum*) might be favoured over tall  
445 annuals (e.g. *J. bufonius*) due to the interaction between stress-tolerant traits, such as plant height,  
446 and high abiotic tolerance.

447 Albeit the interaction between vegetative reproduction and human-related variables was not included  
448 in the most parsimonious multi-SDM, alien species may still benefit from sexual reproduction, as  
449 suggested from the lower importance of human-related variables for the occurrence of alien plants  
450 reproducing sexually in the single-SDMs (Appendix S7). As discussed above, the high dispersal  
451 potential of sexually reproducing alien species, together with the ability to form rich seed banks  
452 (Wódkiewicz et al., 2014), may foster their extensive spread as, for instance, observed for *P. annua*  
453 in the Antarctic Peninsula (Perterra et al., 2017). Nonetheless, by reproducing vegetatively,  
454 perennials might outcompete annuals in maintaining viable and persistent populations during

455 unfavourable seasons. Finally, in spite of their acknowledged importance in conferring invasiveness  
456 in sub-Antarctic islands (Mathakutha et al., 2019), we found no evidence of the role of seed and leaf  
457 traits in affecting species dependence on human-related variables. This is possibly due to the small  
458 set of analysed alien species or to the lack of abundance data, which might have prevented the  
459 emergence of further functional traits-anthropogenic variables relationships.

460 Despite some limitations inherent to our dataset (e.g. limited number of species, lack of alien species  
461 abundance data) and other typical limitations specific to invasive species distribution modelling (e.g.  
462 underestimation of invasion potential, see Jiménez-Valverde et al., 2011), our approach allowed  
463 identifying fine-scale drivers of alien plant species distribution, along with the most likely features  
464 that favour their spread beyond sources of continuous human-assisted introductions. Combining  
465 information on both plant invasiveness and sub-Antarctic islands invasibility, our study provides  
466 relevant insights for anticipating future problematic invasions in these remote and unique  
467 environments.

## 468 **Acknowledgements**

469 We would like to thank Marc Lebouvier (Ing. CNRS) for his suggestions which strongly improved  
470 the manuscript. We acknowledge the contribution of Lise Chambrin (Ing. RNN TAF) and all civil  
471 volunteers of the Institut Polaire Français Paul-Emile Victor (IPEV) who collected data used in this  
472 research. Also, we thank Dr. Matos, Prof. Convey and Prof. Hortal for their helpful suggestions and  
473 comments, which allowed strongly improving the first version of the manuscript.

474 Funding: Project Granted by the French Polar Institute Paul-Emile Victor ‘IPEV 136 Subanteco’,  
475 Institut Universitaire de France (IUF) ‘ENVIE’, Stratégie d’attractivité durable (SAD) Région  
476 Bretagne ‘INFLICT’. JJJ is funded by the Research Foundation Flanders (FWO, project OZ7828),  
477 MC by a Rita Levi-Montalcini grant.

## 478 **Authors’ contribution**

479 DR, MB, FM and JL conceived the idea; MB analysed the data with FM, MC and JL; MB led the  
480 writing of the manuscript. All authors contributed critically to the drafts and gave final approval for  
481 publication.

## 482 **Data availability statement**

483 Data and R code available on Zenodo: <https://doi.org/10.5281/zenodo.4287498>

## 484 **Conflict of interest disclosure**

485 The authors of this article declare that they have no financial conflict of interest with the content of  
486 this article.

## 487 **References**

- 488 Allouche, O., Tsoar, A., & Kadmon, R. (2006). Assessing the accuracy of species distribution models:  
489 prevalence, kappa and the true skill statistic (TSS). *Journal of applied ecology*, 43(6), 1223-1232.
- 490 Barton, K. (2019). MuMIn: Multi-Model Inference. R package version 1.43.6. [https://CRAN.R-](https://CRAN.R-project.org/package=MuMIn)  
491 [project.org/package=MuMIn](https://CRAN.R-project.org/package=MuMIn)
- 492 Broennimann, O., Di Cola, V., & Guisan, A. (2018). ecospat: Spatial Ecology Miscellaneous  
493 Methods. R package version 3.0. <https://CRAN.R-project.org/package=ecospat>

- 494 Burnham, K.P. & Anderson, D.R. (2002) *Model Selection and Multimodel Inference: a Practical*  
495 *Information-Theoretic Approach*, 2nd edn. Springer-Verlag, New York.
- 496 Catford, J.A., Jansson, R., & Nilsson, C. (2009). Reducing redundancy in invasion ecology by  
497 integrating hypotheses into a single theoretical framework. *Divers. Distrib.*, 15(1), 22-40.
- 498 Chwedorzewska, K. J., Gielwanowska, I., Olech, M., Molina-Montenegro, M. A., Wódkiewicz, M.,  
499 & Galera, H. (2015). *Poa annua* L. in the maritime Antarctic: an overview. *Polar Record*, 51(6), 637-  
500 643.
- 501 Convey, P., Coulson, S. J., Worland, M. R., & Sjöblom, A. (2018). The importance of understanding  
502 annual and shorter-term temperature patterns and variation in the surface levels of polar soils for  
503 terrestrial biota. *Polar Biology*, 41(8), 1587-1605.
- 504 Convey, P., Key, R.S., & Key, R.J.D. (2010). The establishment of a new ecological guild of  
505 pollinating insects on sub-Antarctic South Georgia. *Antarct. Sci.*, 22(5), 508-512.
- 506 Convey, P., & Lebouvier, M. (2009). Environmental change and human impacts on terrestrial  
507 ecosystems of the sub-Antarctic islands between their discovery and the mid-twentieth century.  
508 In *Papers and proceedings of the royal society of Tasmania* (Vol. 143, No. 1, pp. 33-44).
- 509 Cornelissen, J.H.C., Lavorel, S., Garnier, E., Diaz, S., Buchmann, N., Gurvich, D.E., ... Pausas, J.G.  
510 (2003). A handbook of protocols for standardised and easy measurement of plant functional traits  
511 worldwide. *Aust. J. Bot.*, 51(4), 335-380.
- 512 Cuba-Díaz, M., Fuentes, E., & Rondanelli-Reyes, M. (2015). Experimental culture of non-indigenous  
513 *Juncus bufonius* from King George Island, South Shetland Island, Antarctica. *极地研究*, 26(1-  
514 English), 24-29.
- 515 Dengler, J. (2016). Phytosociology. *International Encyclopedia of Geography: People, the Earth,*  
516 *Environment and Technology: People, the Earth, Environment and Technology*, 1-6.
- 517 Dietz, H., & Edwards, P. J. (2006). Recognition that causal processes change during plant invasion  
518 helps explain conflicts in evidence. *Ecology*, 87(6), 1359-1367.
- 519 Duffy, G.A., & Lee, J.R. (2019). Ice-free area expansion compounds the non-native species threat to  
520 Antarctic terrestrial biodiversity. *Biol. Cons.*, 232, 253-257.
- 521 Duffy, G.A., Coetzee, B.W., Latombe, G., Akerman, A.H., McGeoch, M.A., & Chown, S.L. (2017).  
522 Barriers to globally invasive species are weakening across the Antarctic. *Divers. Distrib.*, 23(9), 982-  
523 996.
- 524 Etten, J.V. (2018). gdistance: Distances and Routes on Geographical Grids. R package version 1.2-2.  
525 <https://CRAN.R-project.org/package=gdistance>
- 526 Fotheringham, A.S., & Rogerson, P.A. (Eds.). (2008). *The SAGE handbook of spatial analysis*. Sage.
- 527 Fox, J., & Weisberg, S. (2019). *An R Companion to Applied Regression (Third)*. Thousand Oaks  
528 CA: Sage. <https://socialsciences.mcmaster.ca/jfox/Books/Companion/>
- 529 Frenot, Y., Chown, S.L., Whinam, J., Selkirk, P.M., Convey, P., Skotnicki, M., & Bergstrom, D.M.  
530 (2005). Biological invasions in the Antarctic: extent, impacts and implications. *Biol. Rev.*, 80(1), 45-  
531 72.

- 532 Frenot, Y., Gloaguen, J.C., Massé, L., & Lebouvier, M. (2001). Human activities, ecosystem  
533 disturbance and plant invasions in subantarctic Crozet, Kerguelen and Amsterdam Islands. *Biol.*  
534 *Cons.*, *101*(1), 33-50.
- 535 Greve, M., Mathakutha, R., Steyn, C., & Chown, S.L. (2017). Terrestrial invasions on sub-Antarctic  
536 Marion and Prince Edward Islands. *Bothalia-African Biodiversity & Conservation*, *47*(2), 1-21.
- 537 Guisan, A., Thuiller, W., & Zimmermann, N.E. (2017). *Habitat suitability and distribution models:*  
538 *with applications in R*. Cambridge University Press.
- 539 Gutt, J., Zurell, D., Bracegridle, T., Cheung, W., Clark, M., Convey, P., ... Griffiths, H. (2012).  
540 Correlative and dynamic species distribution modelling for ecological predictions in the Antarctic: a  
541 cross-disciplinary concept. *Polar Res.*, *31*(1), 11091.
- 542 Hattab, T., Garzón-López, C.X., Ewald, M., Skowronek, S., Aerts, R., Horen, H., ... Feilhauer, H.  
543 (2017). A unified framework to model the potential and realized distributions of invasive species  
544 within the invaded range. *Divers. Distrib.*, *23*(7), 806-819.
- 545 Hijmans, R.J. (2019). raster: Geographic Data Analysis and Modeling. R package version 3.0-2.  
546 <https://CRAN.R-project.org/package=raster>
- 547 Howard, C., Stephens, P. A., Pearce-Higgins, J. W., Gregory, R. D., & Willis, S. G. (2014). Improving  
548 species distribution models: the value of data on abundance. *Methods Ecol. Evol.*, *5*(6), 506-513.
- 549 Hughes, K.A., Convey, P., Pertierra, L.R., Vega, G.C., Aragón, P., & Olalla-Tárraga, M.Á. (2019).  
550 Human-mediated dispersal of terrestrial species between Antarctic biogeographic regions: A  
551 preliminary risk assessment. *J. Environ. Manage.*, *232*, 73-89.
- 552 Hughes, K.A., Pertierra, L.R., Molina-Montenegro, M.A., & Convey, P. (2015). Biological invasions  
553 in terrestrial Antarctica: what is the current status and can we respond?. *Biodiversity and*  
554 *Conservation*, *24*(5), 1031-1055.
- 555 Huiskes, A.H., Gremmen, N.J., Bergstrom, D.M., Frenot, Y., Hughes, K.A., Imura, S., ... Ware, C.  
556 (2014). Aliens in Antarctica: assessing transfer of plant propagules by human visitors to reduce  
557 invasion risk. *Biol. Cons.*, *171*, 278-284.
- 558 Jiménez-Valverde, A., Peterson, A. T., Soberón, J., Overton, J. M., Aragón, P., & Lobo, J. M. (2011).  
559 Use of niche models in invasive species risk assessments. *Biol. invasions*, *13*(12), 2785-2797.
- 560 Karger, D.N., Conrad, O., Böhner, J., Kawohl, T., Kreft, H., Soria-Auza, R.W., ... Kessler, M. (2017).  
561 Climatologies at high resolution for the earth's land surface areas. *Sci. data*, *4*, 170122.
- 562 Kattge, J., Bönisch, G., Díaz, S., Lavorel, S., Prentice, I.C., Leadley, P., ... Acosta, A.T. (2020). TRY  
563 plant trait database—enhanced coverage and open access. *Global Change Biol.*
- 564 Ladinig U, Hacker J, Neuner G, Wagner J (2013) How endangered is sexual reproduction of high-  
565 mountain plants by summer frosts? Frost resistance, frequency of frost events and risk assessment.  
566 *Oecologia* *171*:743–760
- 567 Lebouvier, M., Laparie, M., Hulle, M., Marais, A., Cozic, Y., Lalouette, L., ... Renault, D. (2011).  
568 The significance of the sub-Antarctic Kerguelen Islands for the assessment of the vulnerability of  
569 native communities to climate change, alien insect invasions and plant viruses. *Biol. Invasions*, *13*(5),  
570 1195-1208.
- 571 Lembrechts, J. J., Aalto, J., Ashcroft, M. B., De Frenne, P., Kopecký, M., Lenoir, J., ... García, R. A.  
572 (2020). SoilTemp: a global database of near-surface temperature. *Global Change Biol.*, *26*, 6616-  
573 6629.

- 574 Lembrechts, J.J., Lenoir, J., Roth, N., Hattab, T., Milbau, A., Haider, S., ... Nuñez, M.A. (2019).  
575 Comparing temperature data sources for use in species distribution models: From in-situ logging to  
576 remote sensing. *Global Ecol. Biogeogr.*, 28(11), 1578-1596.
- 577 Lembrechts, J.J., Pauchard, A., Lenoir, J., Nuñez, M.A., Geron, C., Ven, A., ... Milbau, A. (2016).  
578 Disturbance is the key to plant invasions in cold environments. *PNAS*, 113(49), 14061-14066.
- 579 Lenoir, J., Hattab, T., & Pierre, G. (2017). Climatic microrefugia under anthropogenic climate  
580 change: implications for species redistribution. *Ecography*, 40(2), 253-266.
- 581 Lenoir, J., Gégout, J.C., Guisan, A., Vittoz, P., Wohlgemuth, T., Zimmermann, N.E., ... Virtanen, R.  
582 (2010). Cross-scale analysis of the region effect on vascular plant species diversity in southern and  
583 northern European mountain ranges. *PLoS One*, 5(12).
- 584 le Roux, P.C., Ramaswiela, T., Kalwij, J.M., Shaw, J.D., Ryan, P.G., Treasure, A.M., ... Chown, S.L.  
585 (2013). Human activities, propagule pressure and alien plants in the sub-Antarctic: Tests of  
586 generalities and evidence in support of management. *Biol. Cons.*, 161, 18-27.
- 587 Lockwood, J.L., Cassey, P., & Blackburn, T. (2005). The role of propagule pressure in explaining  
588 species invasions. *Trends Eco. Evo.*, 20(5), 223-228.
- 589 Márquez, E.J., Rada, F., & Fariñas, M.R. (2006). Freezing tolerance in grasses along an altitudinal  
590 gradient in the Venezuelan Andes. *Oecologia*, 150(3), 393-397.
- 591 Massol, F., David, P., Gerdeaux, D., & Jarne, P. (2007). The influence of trophic status and large-  
592 scale climatic change on the structure of fish communities in Perialpine lakes. *J. Anim. Ecol.*, 76(3),  
593 538-551.
- 594 Mathakutha, R., Steyn, C., le Roux, P.C., Blom, I.J., Chown, S.L., Daru, B.H., ... Greve, M. (2019).  
595 Invasive species differ in key functional traits from native and non-invasive alien plant species. *J.*  
596 *Veg. Sci.*, 30(5), 994-1006.
- 597 Moser, D., Lenzner, B., Weigelt, P., Dawson, W., Kreft, H., Pergl, J., ... Cassey, P. (2018).  
598 Remoteness promotes biological invasions on islands worldwide. *PNAS*, 115(37), 9270-9275.
- 599 Ottaviani, G., Keppel, G., Götzenberger, L., Harrison, S., Opedal, Ø. H., Conti, L., ... Negoita, L.  
600 (2020). Linking Plant Functional Ecology to Island Biogeography. *Trends Plant Sci.*
- 601 Pérez-Harguindeguy, N., Diaz, S., Gamier, E., Lavorel, S., Poorter, H., Jaureguiberry, P., ... Urcelay,  
602 C. (2013). New handbook for standardised measurement of plant functional traits worldwide. *Aust.*  
603 *J. Bot.* 61: 167-234.
- 604 Pertierra, L.R., Aragón, P., Shaw, J.D., Bergstrom, D.M., Terauds, A., & Olalla-Tárraga, M.Á.  
605 (2017). Global thermal niche models of two European grasses show high invasion risks in  
606 Antarctica. *Global Change Biol.*, 23(7), 2863-2873.
- 607 Pickering, C., & Mount, A. (2010). Do tourists disperse weed seed? A global review of unintentional  
608 human-mediated terrestrial seed dispersal on clothing, vehicles and horses. *Journal of Sustainable*  
609 *Tourism*, 18(2), 239-256.
- 610 Pyšek, P., Manceur, A.M., Alba, C., McGregor, K.F., Pergl, J., Štajerová, K., ... Lučanová, M. (2015).  
611 Naturalization of central European plants in North America: species traits, habitats, propagule  
612 pressure, residence time. *Ecology*, 96(3), 762-774.
- 613 Pyšek, P., & Richardson, D.M. (2008). Traits associated with invasiveness in alien plants: where do  
614 we stand?. In *Biol. Invasions* (pp. 97-125). Springer, Berlin, Heidelberg.

- 615 Richardson, D.M., & Pyšek, P. (2006). Plant invasions: merging the concepts of species invasiveness  
616 and community invasibility. *Prog. Phys. Geogr.*, 30(3), 409-431.
- 617 Shaw, J.D. (2013). Southern Ocean Islands invaded: conserving biodiversity in the world's last  
618 wilderness. In *Plant Invasions in Protected Areas* (pp. 449-470). Springer, Dordrecht.
- 619 Srivastava, V., Lafond, V., & Griess, V. C. (2019). Species distribution models (SDM): applications,  
620 benefits and challenges in invasive species management. *CAB Reviews*, 14(020), 1-13.  
621 10.1079/PAVSNNR201914020
- 622 van Kleunen, M., Dawson, W., & Maurel, N. (2015). Characteristics of successful alien  
623 plants. *Molecular Ecology*, 24(9), 1954-1968.
- 624 van Kleunen, M., Weber, E., & Fischer, M. (2010). A meta-analysis of trait differences between  
625 invasive and non-invasive plant species. *Ecology letters*, 13(2), 235-245.
- 626 Whinam, J., Chilcott, N., & Bergstrom, D.M. (2005). Subantarctic hitchhikers: expeditioners as  
627 vectors for the introduction of alien organisms. *Biol. Cons.*, 121(2), 207-219.
- 628 Wilson, J.R.U., Richardson, D.M., Rouget, M., Proches, S., Amis, M.A., Henderson, L. ... Thuiller,  
629 W. (2007). Residence time and potential range: crucial considerations in modelling plant invasions.  
630 *Divers. Distrib.*, 13, 11-22.
- 631 Wódkiewicz, M., Ziemiański, M., Kwiecień, K., Chwedorzewska, K. J., & Galera, H. (2014). Spatial  
632 structure of the soil seed bank of *Poa annua* L.—alien species in the Antarctica. *Biodiversity and  
633 Conservation*, 23(6), 1339-1346.
- 634 Zefferman, E., Stevens, J. T., Charles, G. K., Dunbar-Irwin, M., Emam, T., Fick, S., ... Young, T. P.  
635 (2015). Plant communities in harsh sites are less invaded: a summary of observations and proposed  
636 explanations. *AoB Plants*, 7.
- 637



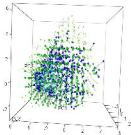

## LOW-SPREAD SPECIES

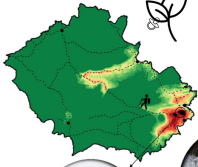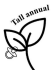

## HIGH-SPREAD SPECIES

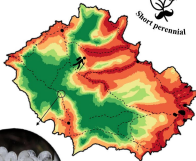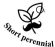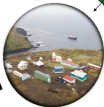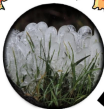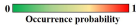

Source: https://www.biorxiv.org/content/10.1101/2020.07.19.210880v2.full.pdf
